# Supplementary material for: Opinion: Strengthening Research in the Global South: Atmospheric Science Opportunities in South America and Africa
Source: Copernicus journal article supplement (doi:10.5194/egusphere-2023-2566), 2023-11-06
Supplement: Supplementary file [file egusphere-2023-2566-RC2-supplement.pdf]

Opinion: Strengthening Research in the Global South: Atmospheric Science Opportunities in South America and Africa

**Manuscript Number: 2023-2566**

### **Summary**

The authors presented Africa and South America as the two geographical areas in the Global South that are underrepresented in the atmospheric science community. The article identified some common challenges and constraints hindering the development of atmospheric science research in the regions. They also highlighted the strengths of the researchers in the regions and their critical role in the future of atmospheric science research

### **Technical observations**

Line 38 – 39: References should be cited in chronological order according to the Journal style

Line 88: References should be cited in chronological order according to the Journal style

### **Recommendation**

The article is indeed an opinion which reflected the true situation in the research community in the regions of interest. The article could add value to the scientific community if published. I recommend it for publication after appropriate editorial work
